# Supplementary material
Source: HighWire-hosted journal article supplement (http://www.ajnr.org/highwire/filestream/52332/field_highwire_adjunct_files/0/3091_table.pdf)
Supplement: 3091_table.pdf [file 3091_table.pdf]

**On-line Table: Demographic characteristics of enrolled patients**

| Patient | Age                           | Sex      | Naïve vs. Exposed         | Prior Steroids | Tumor Location                                 | SIACI Dose (mg/kg)           | Arteries Selectively Injected                                     | # Days from SIACI until MRI/ MRS |
|---------|-------------------------------|----------|---------------------------|----------------|------------------------------------------------|------------------------------|-------------------------------------------------------------------|----------------------------------|
| 1       | 44                            | F        | —                         | —              | RT basal ganglia, RT frontal, and CC           | 6                            | RT MCA (M1)                                                       | 23                               |
| 2       | 53                            | M        | +                         | +              | RT basal ganglia, genu of CC                   | 6                            | RT MCA (M1)                                                       | 22                               |
| 3       | 67                            | F        | +                         | +              | RT parieto-occipital                           | 6                            | RT MCA, Rolandic branch                                           | 16                               |
| 4       | 44                            | F        | +                         | +              | LT temporal                                    | 8                            | INF division, INF branch of LT MCA                                | 25                               |
| 5       | 30                            | M        | +                         | —              | LT frontal, parietal, and BG                   | 10                           | SUP division, INF trunk of LT MCA                                 | 23                               |
| 6       | 47                            | M        | —                         | +              | LT frontal, genu of CC                         | 11                           | ½ into LT ACA (A2) and ½ into LT MCA (M1)                         | 30                               |
| 7       | 38                            | F        | —                         | +              | LT post temporal, LT occipital, splenium of CC | 13                           | ½ into LT PCA, ¼ LT MCA (posterior M2), ¼ into anterior choroidal | 17                               |
| 8       | 49                            | M        | —                         | —              | RT frontal                                     | 14                           | RT MCA (M1)                                                       | 21                               |
| 9       | 66                            | M        | —                         | +              | LT frontal                                     | 14                           | LT MCA (distal M1)                                                | 15                               |
| 10      | 46                            | M        | —                         | +              | BL deep parietal lobes and splenium of CC      | 14                           | Basilar artery terminus                                           | 21                               |
| 11      | 63                            | M        | +                         | +              | RT post temporal, RT occipital, splenium of CC | 15                           | ⅔ RT PCA & ⅓ LT PCA                                               | 22                               |
| 12      | 29                            | F        | —                         | +              | Posterior body and splenium of CC, RT thalamus | 15                           | ½ proximal RT PCA and ½ proximal LT PCA                           | 23                               |
| 13      | 61                            | M        | +                         | +              | RT frontal, RT genu of CC                      | 15                           | ⅔ RT MCA and ⅓ RT ACA                                             | 24                               |
| 14      | 32                            | M        | —                         | —              | LT frontal, genu of CC, anterior body of CC    | 15                           | ½ LT MCA, ¼ RT A1 ACA, ¼ LT A1 ACA                                | 27                               |
| 15      | 55                            | M        | —                         | —              | High parasagittal RT parietal                  | 15                           | ⅔ RT MCA (M1) and ⅓ RT ACA (A2)                                   | 29                               |
| 16      | 31                            | F        | —                         | +              | RT parietal, occipital, and splenium of CC     | 15                           | ½ RT PCA (P1) and ½ RT MCA (M1)                                   | 23                               |
| 17      | 58                            | F        | —                         | +              | RT post temporal and frontoparietal operculum  | 15                           | RT MCA (M1)                                                       | 16                               |
| 18      | 49                            | M        | —                         | +              | RT frontal                                     | 15                           | RT MCA (M1)                                                       | 19                               |
|         | Mean (range)<br>47.89 (29–67) | M:F 11:7 | Naïve:<br>Exposed<br>12:6 | No:Yes<br>5:13 |                                                | Mean (range)<br>12.39 (6–15) |                                                                   | Mean (range)<br>22.0 (15–30)     |

**Note:**—BG indicates basal ganglia; BL, bilateral; CC, corpus callosum; F indicates female; LT, left; M, male; M1, proximal MCA segment (ICA bifurcation to MCA bifurcation/trifurcation); P1, proximal posterior communicating artery segment; RT, right; INF, inferior; SUP, superior; ACA, anterior cerebral artery; PCA, posterior cerebral artery; post, posterior.
